# Supplementary material for: The barley leaf rust resistance gene Rph3 encodes a predicted membrane protein and is induced upon infection by avirulent pathotypes of Puccinia hordei
Source: PubMed Central journal article supplement (PMC9061838; doi:10.1038/s41467-022-29840-1), 2022-05-02
Supplement: 41467_2022_29840_MOESM1_ESM.pdf [file 41467_2022_29840_MOESM1_ESM.pdf]

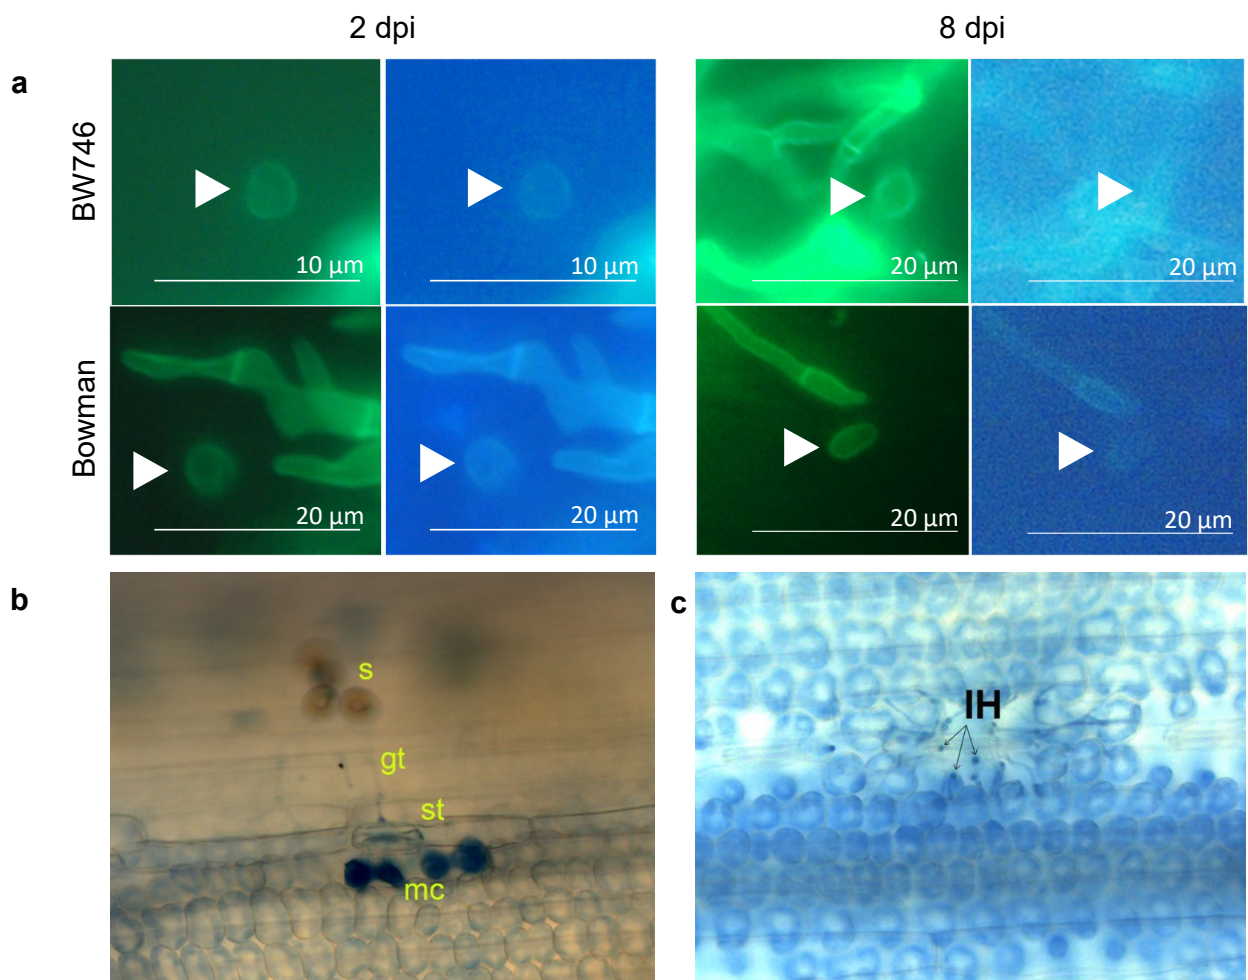

**Supplementary Figure 1.** Infection of resistant and susceptible barley lines with *Puccinia hordei* pathotype 5453 P+. **a** At both two dpi and eight dpi, haustoria were present in infected cells of both BW746 and Bowman (green images on left; arrowheads show WGA-FITC stained haustoria). Haustorium-containing plant cells at these same infection sites were not associated with autofluorescent cell death when observed under UV light, in either line (blue images on right). **b** Germinated spores (s) can be seen on the leaf surface of BW746 that have formed germ tubes (gt). One of these infection sites has located a plant stoma (st) and four underlying mesophyll cells (mc) have strongly stained with trypan blue, indicating membrane changes in these mesophyll cells in response to fungal infection. **c** In contrast to BW746, all the mesophyll cells at a fungal infection site on Bowman show no stain uptake indicating little changes in membrane structure of infected cells. Thread-like fungal infection (IH) can be seen at this infection site ramifying between host mesophyll cells. The experiment was repeated three times with similar results.

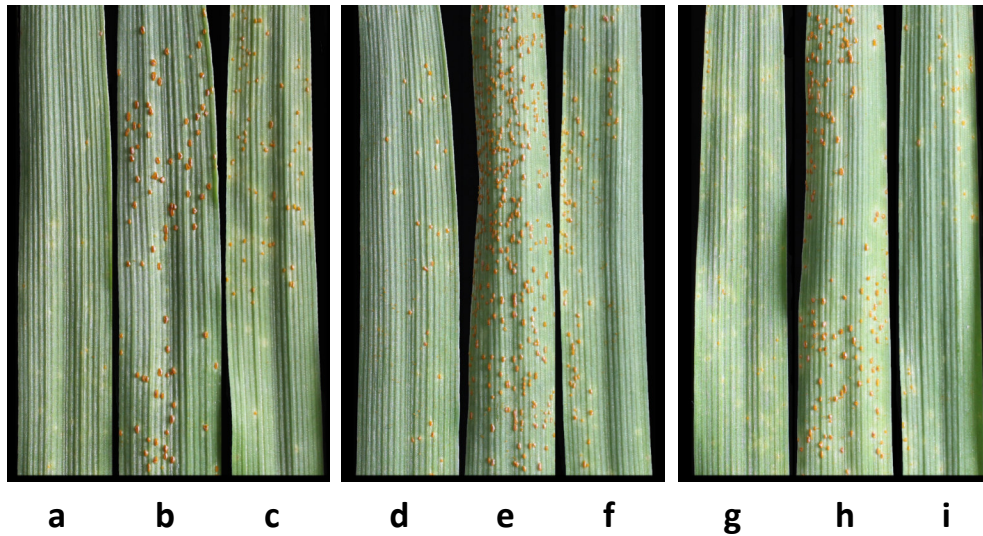

**Supplementary Figure 2.** *Rph3* is incompletely dominant. Infection types observed in resistant, susceptible parents and offspring. (A) Scarlett (*Rph3/Rph3*); (B) Tallon (*rph3/rph3*); (C) Scarlett x Tallon  $F_1$  (*Rph3/rph3*); (D) Alexis (*Rph3/Rph3*); (E) Sloop (*rph3/rph3*); (F) Alexis x Sloop  $F_1$  (*Rph3/rph3*); (G) BW746 (*Rph3/Rph3*); (H) Bowman (*rph3/rph3*); (I) BW746 x Bowman  $F_1$  (*Rph3/rph3*). The inoculation was performed on 10 – 15 plants of each material with similar results.

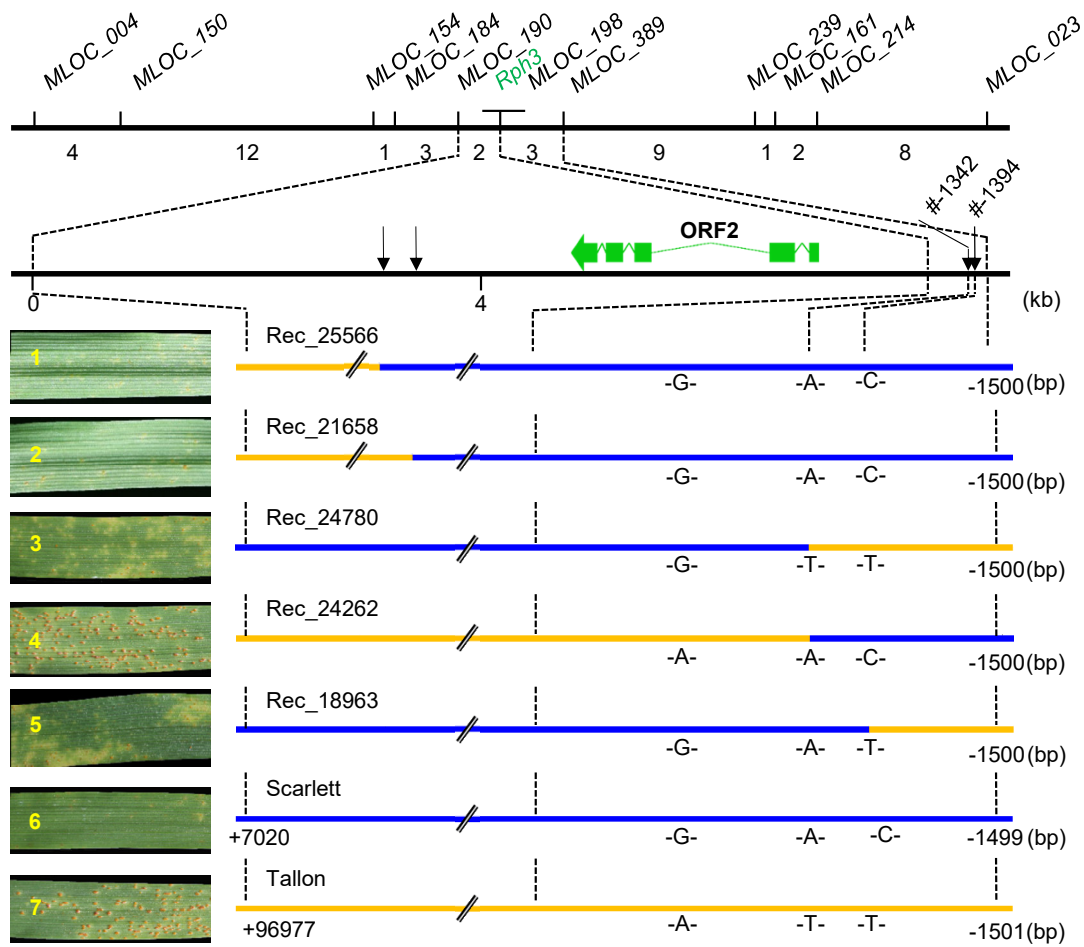

**Supplementary Figure 3.** Locations of recombination events in the vicinity of the *Rph3* gene were confirmed by Sanger sequencing. The genetic and physical map of the *Rph3* locus delimited by the closest flanking markers MLOC\_190 and MLOC\_389. The crossover occurred between the nucleotide position -1342 and -970, resulting in genotype changes from *Rph3* (represented by blue part) to *rph3* (represented by the orange part) in the plant numbered 24262 and vice versa in the plant numbered 24780; the crossover between the nucleotide position -1342 and -1394 resulted in the genotype change from *Rph3* to *rph3* in the plant numbered 18963. The infection type observed in resistant (1), susceptible (5) parents, and three families (2, 3, 4) carrying critical recombinants upstream of *Rph3*. The inoculation was performed on 15 plants of each material with similar results.

The pustules size of mutant lines in compared with wild types

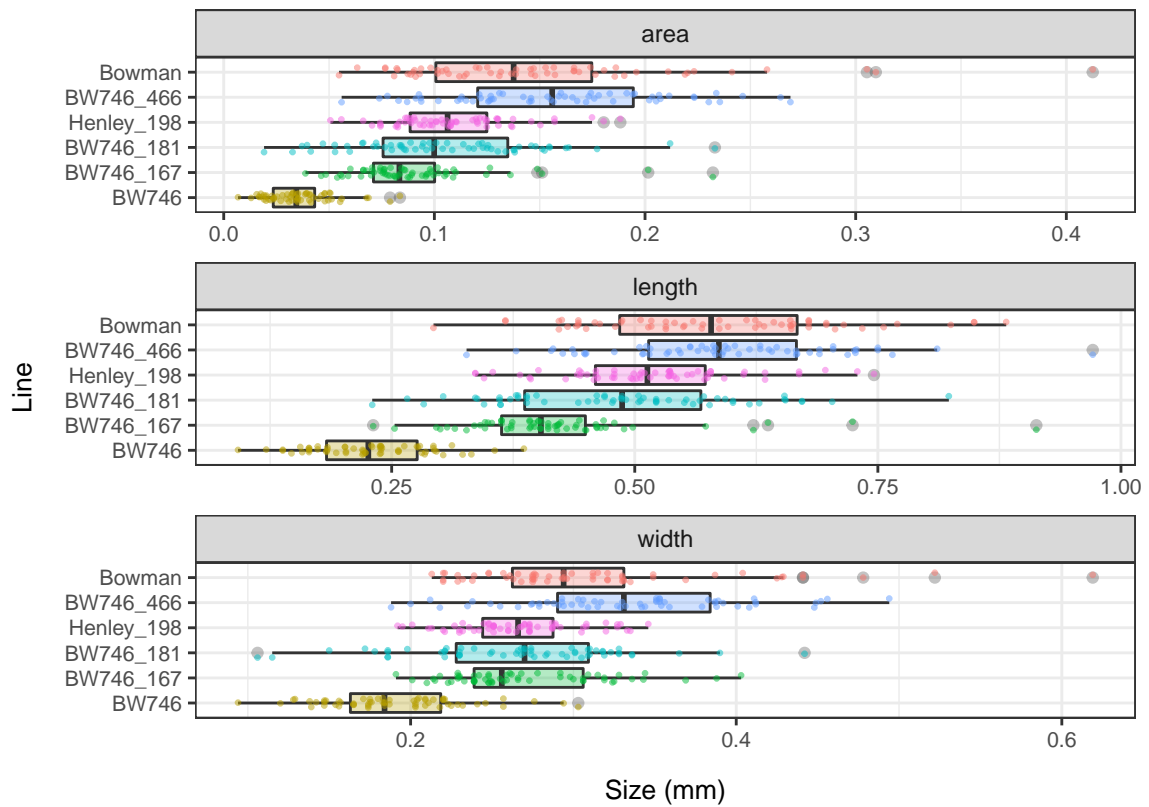

**Supplementary Figure 4.** Uredinium size of *P. hordei* pathotype 5453 P+ in the knock-out mutants. The data for each mutant were gathered from 60 uredinia (3 leaves × 20 uredinia/leaf) using the ImageJ software. In each box plot, the band within the box indicates the median; the box indicates the first and the third quartile; the whiskers indicate  $\pm 1.5 \times$  interquartile range; the minimum value excluding outliers is shown at the beginning of the left whisker and the maximum value excluding outlier is shown at the end of the right whisker.

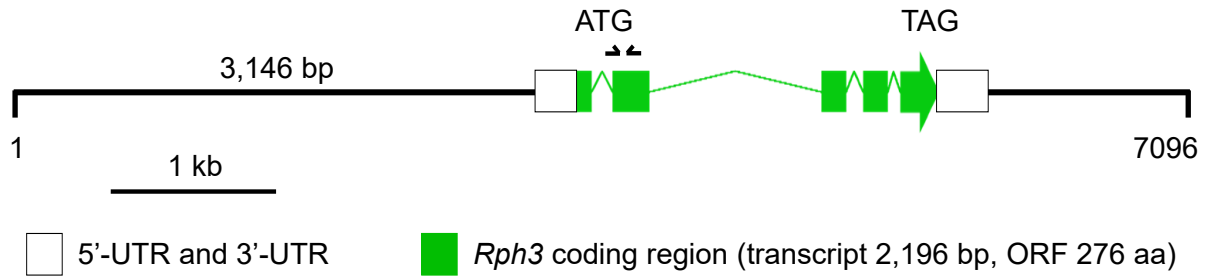

**Supplementary Figure 5.** The transgene sequence comprised a 7,096 bp genomic fragment harbouring the *Rph3* coding sequence with its native promoter. Exons are shown as green squares with the arrow in the last exon showing the transcript direction. The *Rph3* gene (including introns and exons) was 2,196 bp. The 5'-UTR and 3'-UTR of 254- and 292-bp, respectively, are shown as white squares. Black arrows illustrate the position of the diagnostic MLOC\_400 marker for the *Rph3* gene.

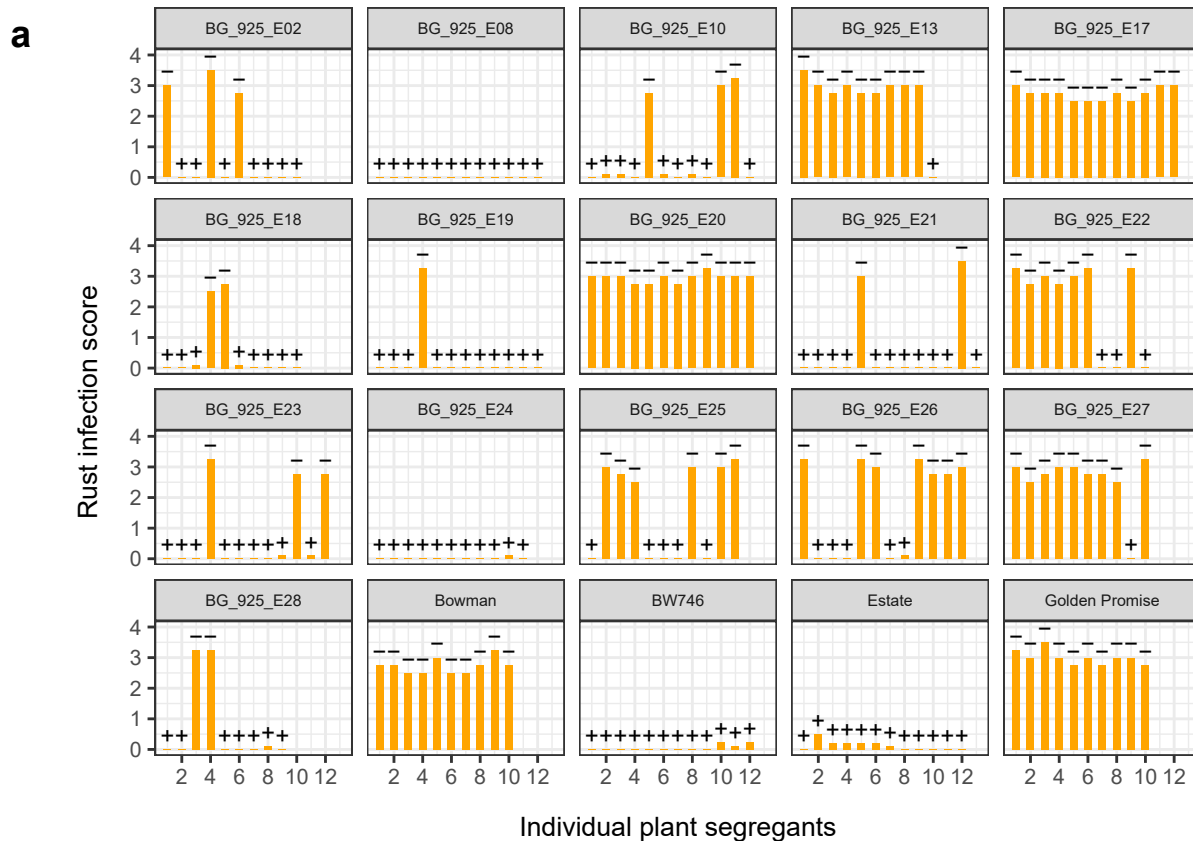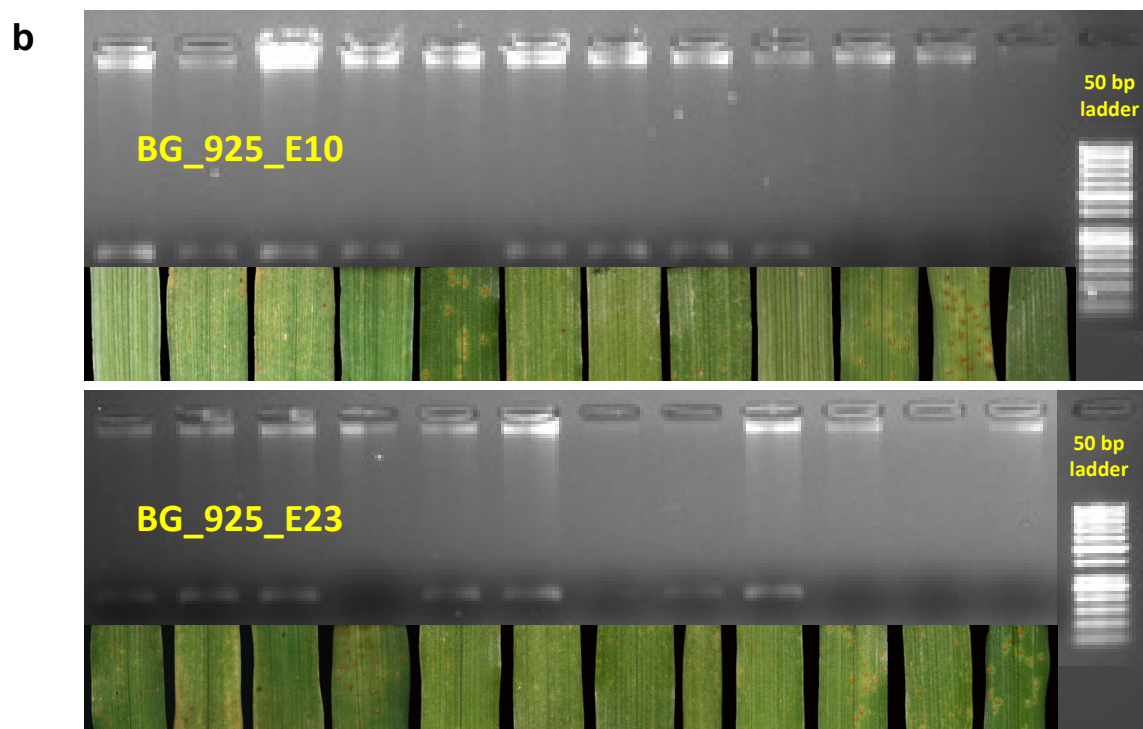

**Supplementary Figure 6.** Progeny tests of *Rph3* transgenic plants. **a** The responses to *P. hordei* pathotype 16-3 of 16 independent transformants ( $n=1$ ). The transgene plants with (+) and without (-) *Rph3* were identified by the dominant marker MLOC\_400. **b** Phenotypes of some transgenic gene families. The bands on the agarose gel show presence of the *Rph3* marker. The image under the agarose gel shows the leaf rust response. The experiment was conducted without replications.

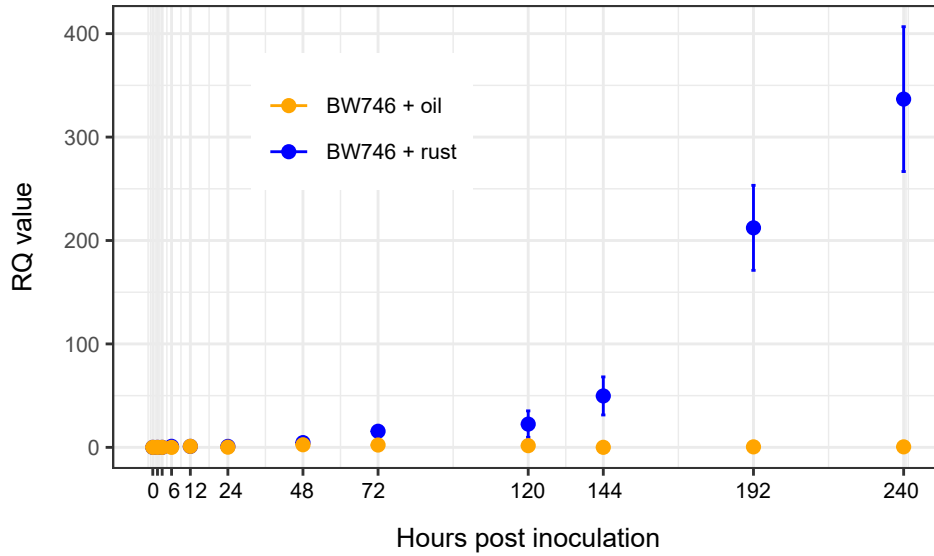

**Supplementary Figure 7.** Expression profile of the *Rph3* allele in an extended time course. Blue dots indicate the expression of *Rph3* for the treatment challenged with *P. hordei* pathotype 5453 P+ and by orange dots for the mock inoculation. Relative quantification (RQ) value was calculated using the delta-delta method with  $RQ = 2^{-\Delta\Delta Cq}$ . Values represent means  $\pm$  SD (shown as the error bars) (n=3).

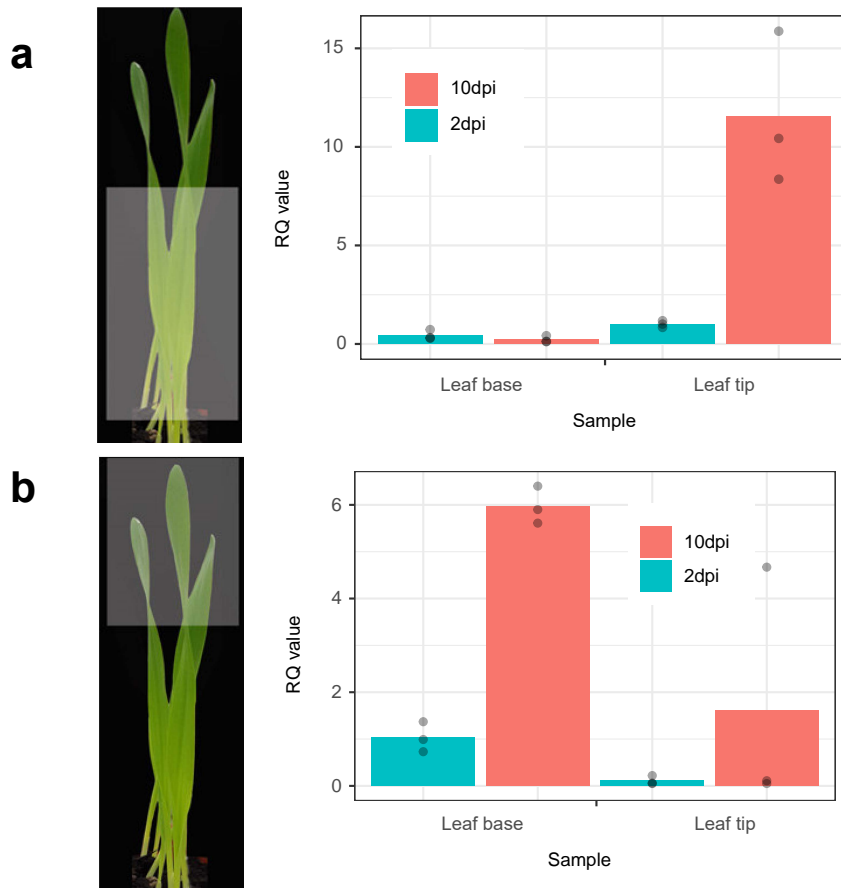

**Supplementary Figure 8.** Localized expression of the *Rph3* allele in cv. BW746 challenged with *P. hordei* pathotype 5453 P+. Distal (a) and proximal (b) leaf sections were inoculated separately as illustrated, and expression in the respective host tissues was determined. Relative quantification (RQ) value was calculated using the delta-delta method with  $RQ = 2^{-\Delta\Delta Cq}$  (n=3).



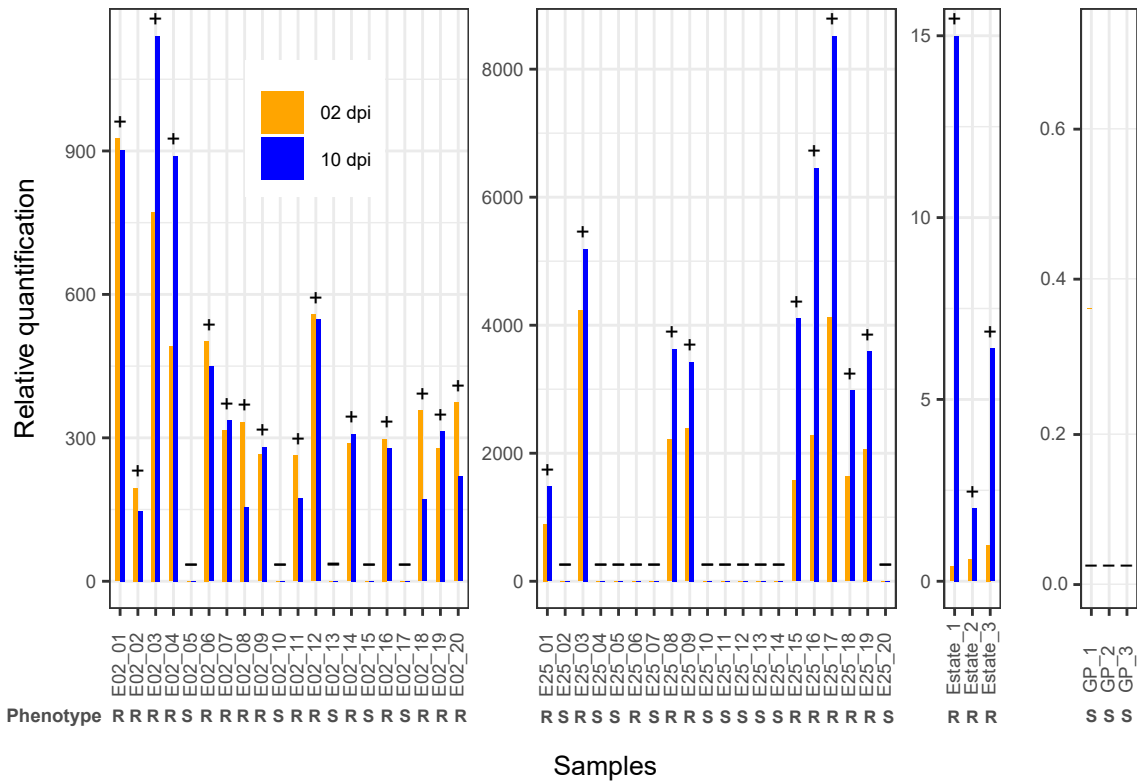

**Supplementary Figure 9.** Expression of the *Rph3* allele in transgenic and control materials challenged with *P. hordei* *Rph3*-avrulent pathotype 16-3. Expression levels were determined across the *Rph3*-segregating T<sub>1</sub> families E2 (a) and E25 (b), cv. Estate (c) as positive control, and cv. Golden Promise (d) as negative control. Line E25-06 is the only exception with a negative PCR indicative of not carrying the transgenic gene but showing a resistant phenotype. This is probably due to the line scape from rust pathogen during the inoculation. The +/- symbols represent the presence/absence of the *Rph3* allele based on the diagnosis marker MLOC\_400. Relative quantification (RQ) values were calculated using the delta-delta method with  $RQ = 2^{-\Delta\Delta Cq}$  (n=1). The infection types of 0 – 2 were interpreted as resistance (R), and the infection type of 2+ and above were interpreted as susceptible (S).

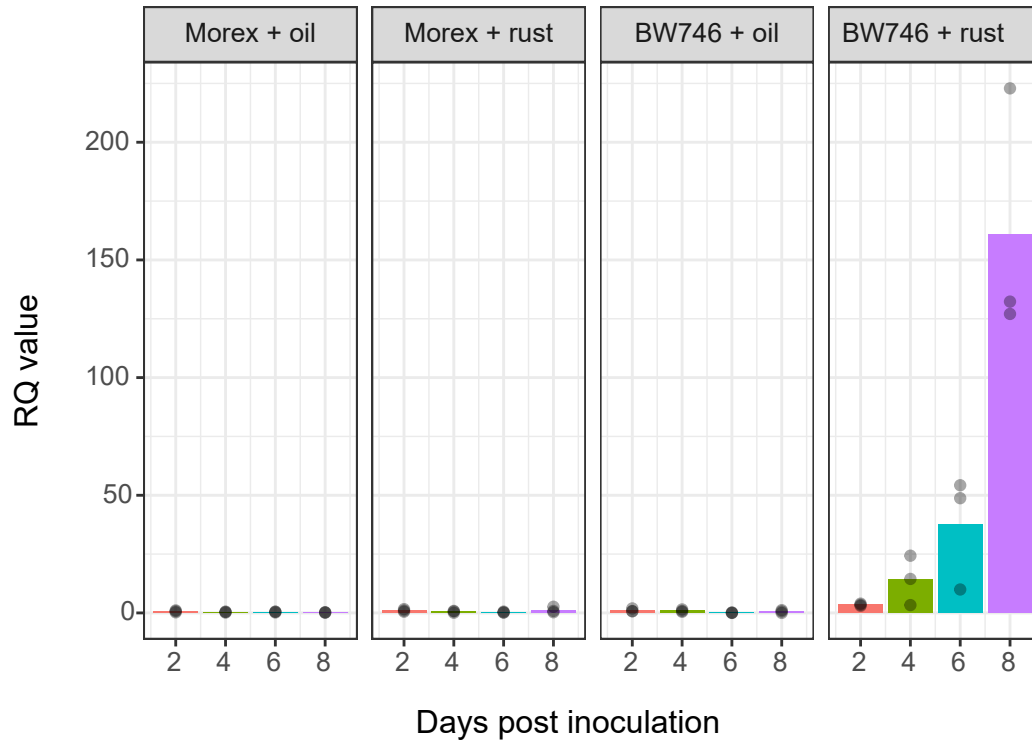

**Supplementary Figure 10.** Expression profiles for susceptible (cv. Morex, *rph3*) and resistant (BW746, *Rph3*) genotypes when treated with oil alone or challenged with *P. hordei* pathotype 5453 P+. To examine the expression profile of homologs of the *Rph3* gene in susceptible cv. Morex, the marker was designed based on a conserved sequence among four homologs, namely *Morex\_ORF5*, *Morex\_ORF10*, *Morex\_ORF11*, and *Morex\_ORF12*, so that it can detect the transcript level of all these genes in total. The expression profile of *Rph3* was examined by using the marker *Rph3\_qPCR7*. The relative quantification (RQ) value was calculated using the delta-delta method with  $RQ = 2^{-\Delta\Delta Cq}$  (n=3).

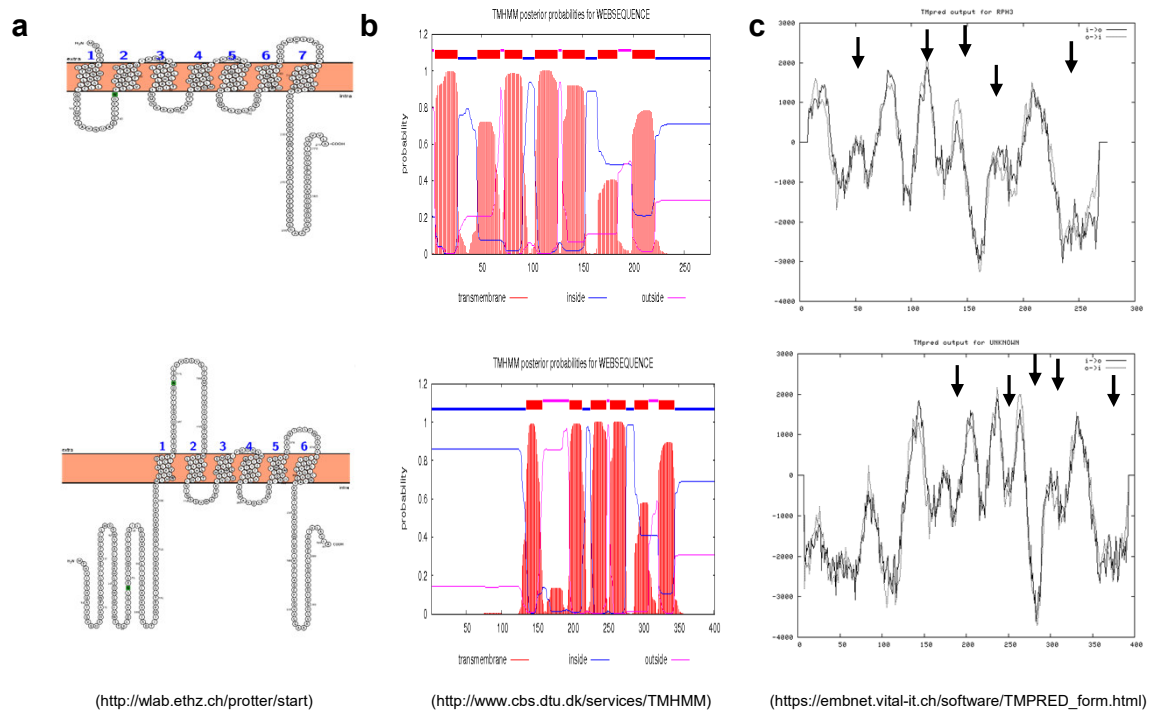

**Supplementary Figure 11.** Predicted secondary structure of RPH3 protein (upper) and its ortholog in the wheat D genome (lower). **a** The prediction made by Protter in which RPH3 protein has seven transmembrane helices, whereas TraesCS7D\_RPH3\_LIKE has six transmembrane helices. N-glycol motifs are marked in green. Prediction made by the TMHMM (**b**) and TMPRED (**c**) tools; arrows indicate the transmembrane helices.

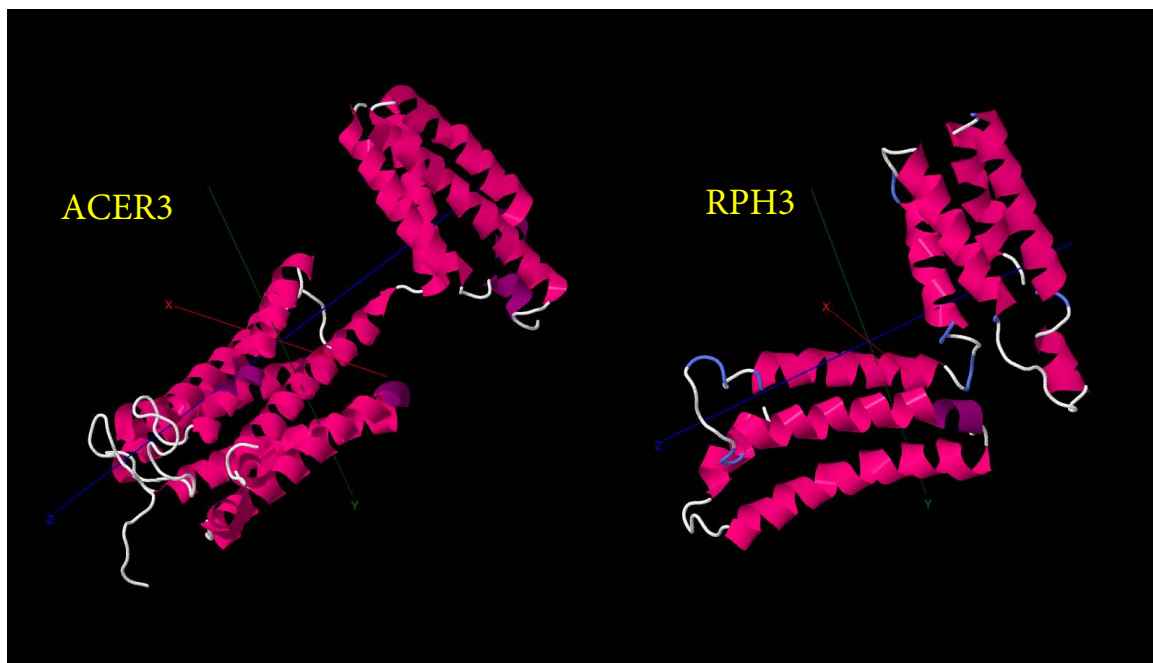

**Supplementary Figure 12.** Structure of RPH3 compared to homology modelled ACER3 using MODELLER with 6YXH\_A as template

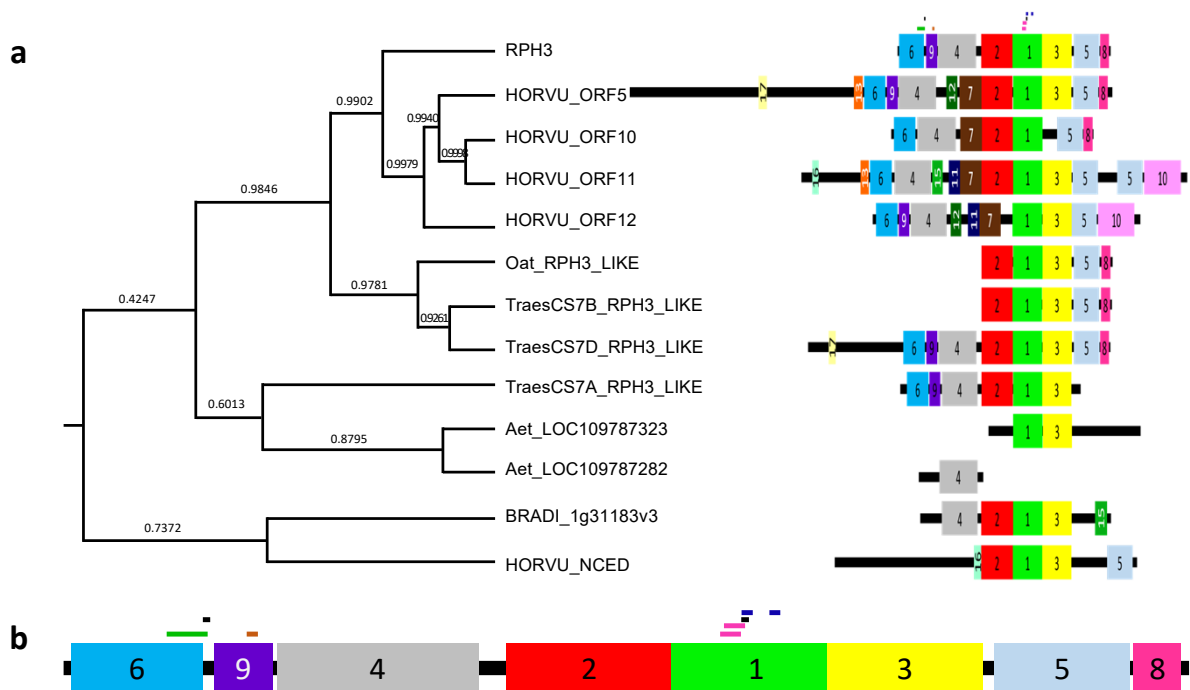

**Supplementary Figure 13.** Origin of the *Rph3* allele. **a** Comparison of the *Rph3* sequence with *rph3* in cv. Morex and homologs in other species. Four copies of the recessive allele were found in the susceptible haplotype (cv. Morex) encoding four HORVU proteins shown in the phylogenetic tree. The homologs were also found in other crop species, including wheat A, B, and D genomes (three TraesCS proteins), *Brachypodium distachyon* (BRADI protein), and *Aegilops tauschii* (two Aet proteins). The tree was constructed using the maximum likelihood approach based on the protein sequences. The sequences were aligned using Clustal Omega before the phylogenetic analysis. **b** Motifs present in RPH3 homologs. Five homologs of RPH3 in barley include HORVU\_NCED sharing 46% identity, HORVU\_ORF5 with 72% identity, HORVU\_ORF10 with 69% identity, HORVU\_ORF11 with 90% identity, and HORVU\_ORF12 with 72% identity. Three orthologs of RPH3 on wheat A, B, and D genome (named TRAesCS7A\_RPH3\_LIKE, TRAesCS7B\_RPH3\_LIKE, and TRAesCS7D\_RPH3\_LIKE) share 57%, 88% and 88% identity with RPH3 respectively. Two orthologs from *Aegilops tauschii* (named Aet\_LOC109787323 and Aet\_LOC109787282) shared 41% and 42% identity with RPH3, respectively. The ortholog in *Brachypodium distachyon* (BRADI\_1g31183v3) has 57% identity with RPH3 and Oat\_RPH3\_LIKE in oat shares 86% identity with RPH3. Motif 1 contains two N-myristoylation sites (pink bars), phosphorylation site of protein kinase C (black bar), and phosphorylation sites of casein kinase II (blue bars), motif 6 contains the serpin signature (green bar), and motif 9 contains N-glycosylation site (brown bar).

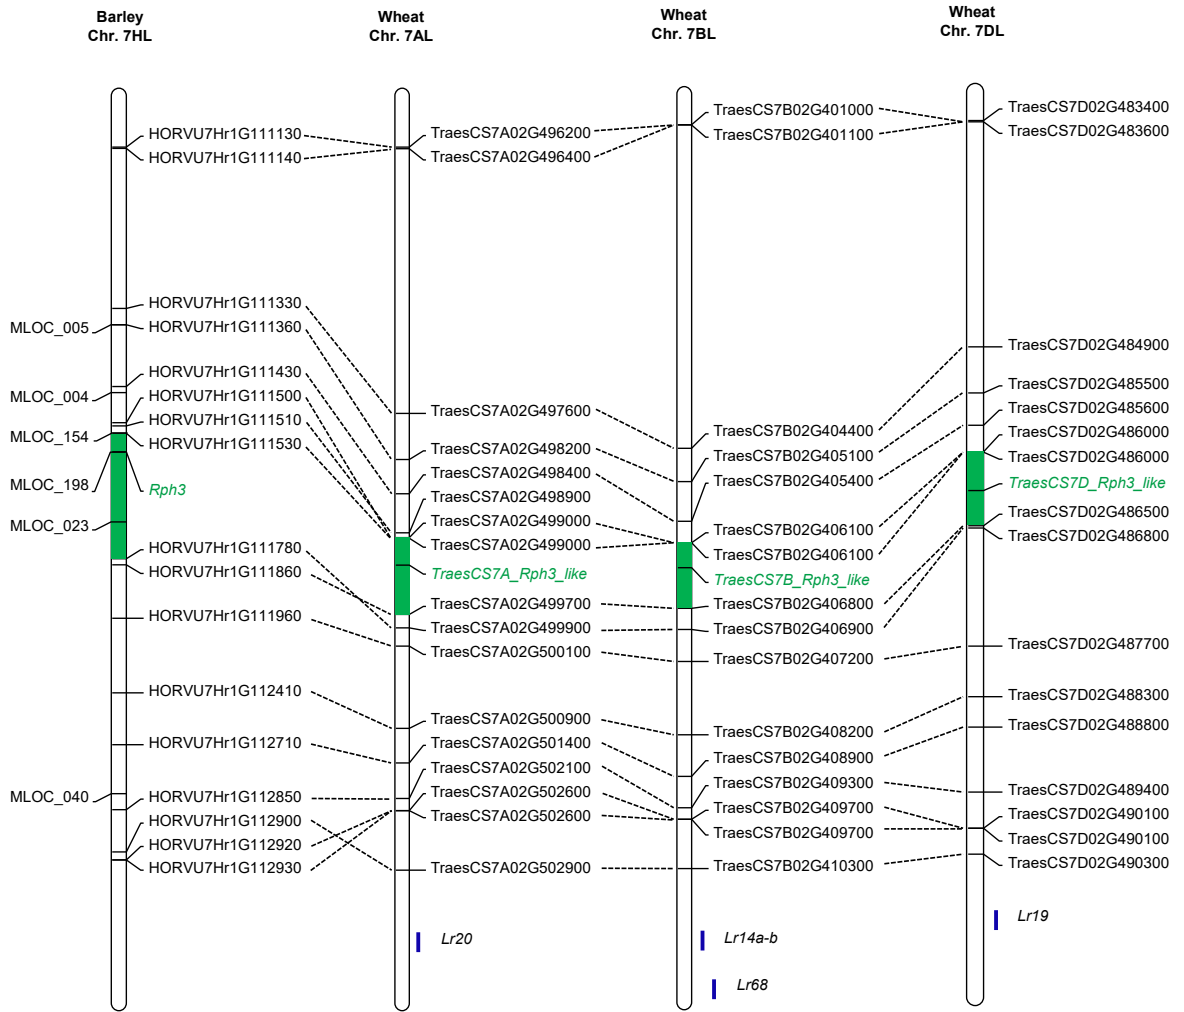

**Supplementary Figure 14.** Synteny on chromosome 7HL was highly conserved in wheat. Most of the annotated high-confidence genes in barley have their homolog/orthologs in the wheat A, B, and D sub-genomes. The physical windows of the *Rph3* locus are shown as green boxes, and possible orthologs of *Rph3* are green scripts. Four designated wheat leaf rust resistance loci on the long arm of chromosomes 7A, 7B, and 7D are shown by blue bars.

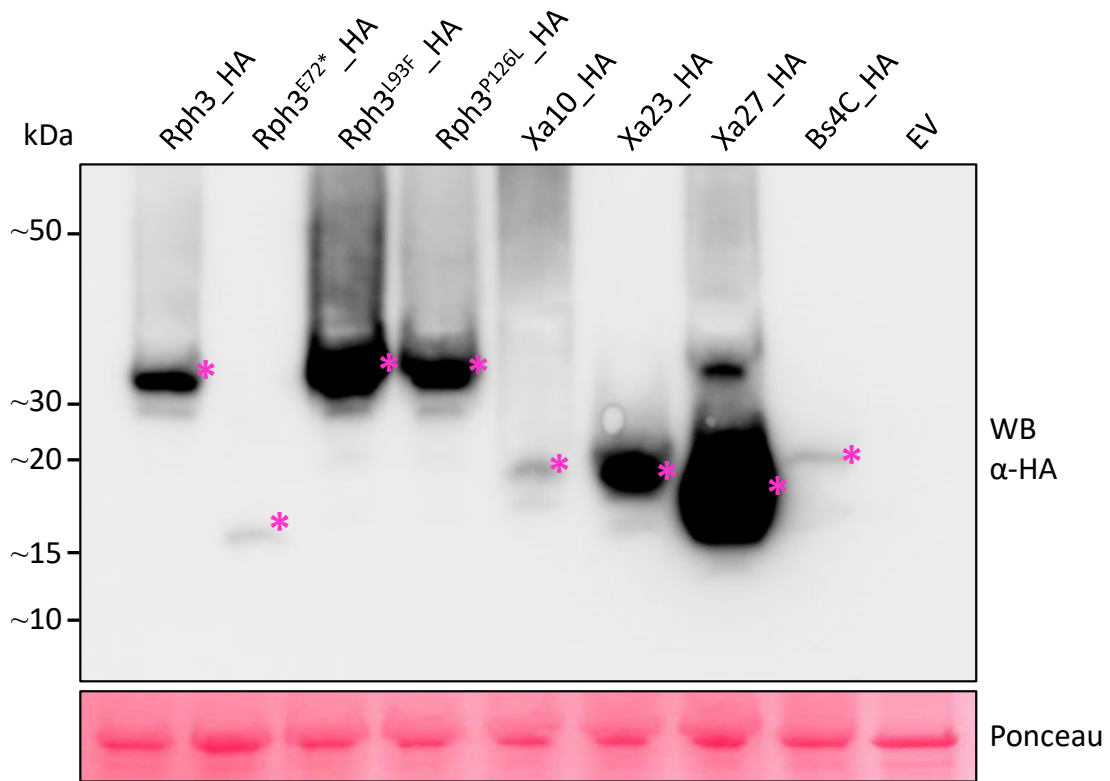

**Supplementary Figure 15.** Protein accumulation of Rph3 variants and known executor genes. Protein accumulation of RPH3 (37 kDa), RPH3<sup>E72\*</sup> (15 kDa), RPH3<sup>L93F</sup> (37 kDa), RPH3<sup>P126L</sup> (37 kDa), and executor genes XA10 (21 kDa), XA23 (20.5 kDa), XA27 (19.5 kDa) and BS4C (27 kDa) in *N. benthamiana* leaves two days after agroinfiltration. All proteins were tagged at the C-terminus with a 6xHA epitope. Asterisks indicate the expected molecular mass for a given recombinant protein. EV corresponds to empty vector control. Protein loading was checked with Ponceau S solution (Sigma, #6226-79-5). Three independent biological replicates were performed with similar results.

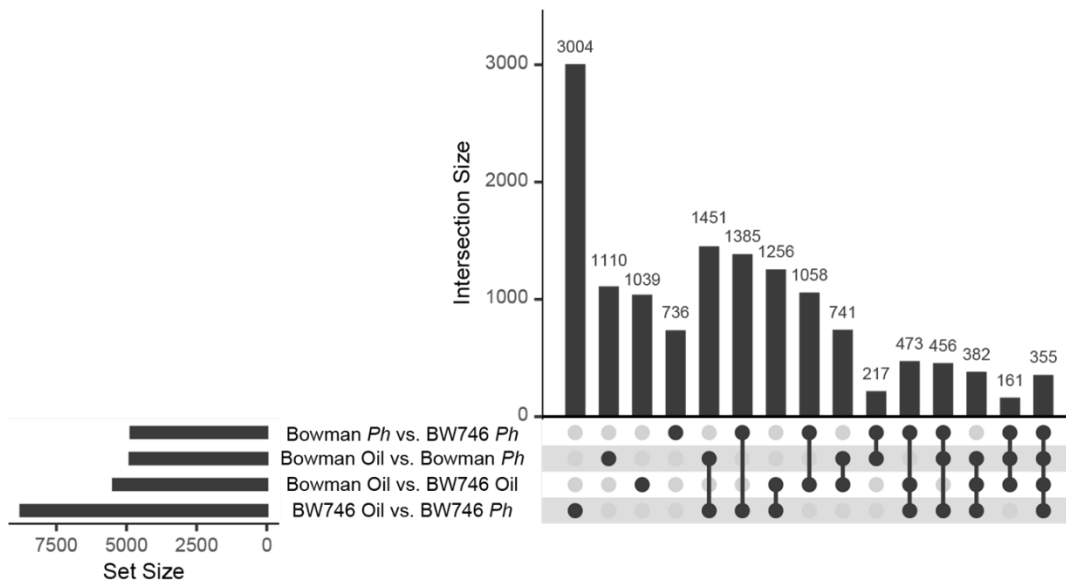

**Supplementary Figure 16.** Pair-wise comparison of differentially expressed genes identified in cv. Bowman (*rph3*) and near-isogenic BW746 (*Rph3*) inoculated with *P. hordei* or oil alone (mock) at two days post-inoculation. In mock-inoculated conditions, 5,465 differentially expressed genes (DEG) were identified between cv. Bowman and BW746, indicating that a considerable number of genes are differentially expressed between these barley accessions at steady-state levels. Volcano plots showed that most expression differences were minor and likely associated with genetic differences between cv. Bowman and BW746 and their interaction with the oil medium used for mock inoculation. In *P. hordei*-inoculated leaves, there were 4,841 DEG for cv. Bowman versus BW746, and for mock-inoculated versus *P. hordei*-inoculated cv. Bowman, there were 4,873 DEG. The number of DEG between mock and *P. hordei*-inoculated in BW746 was 8,762.

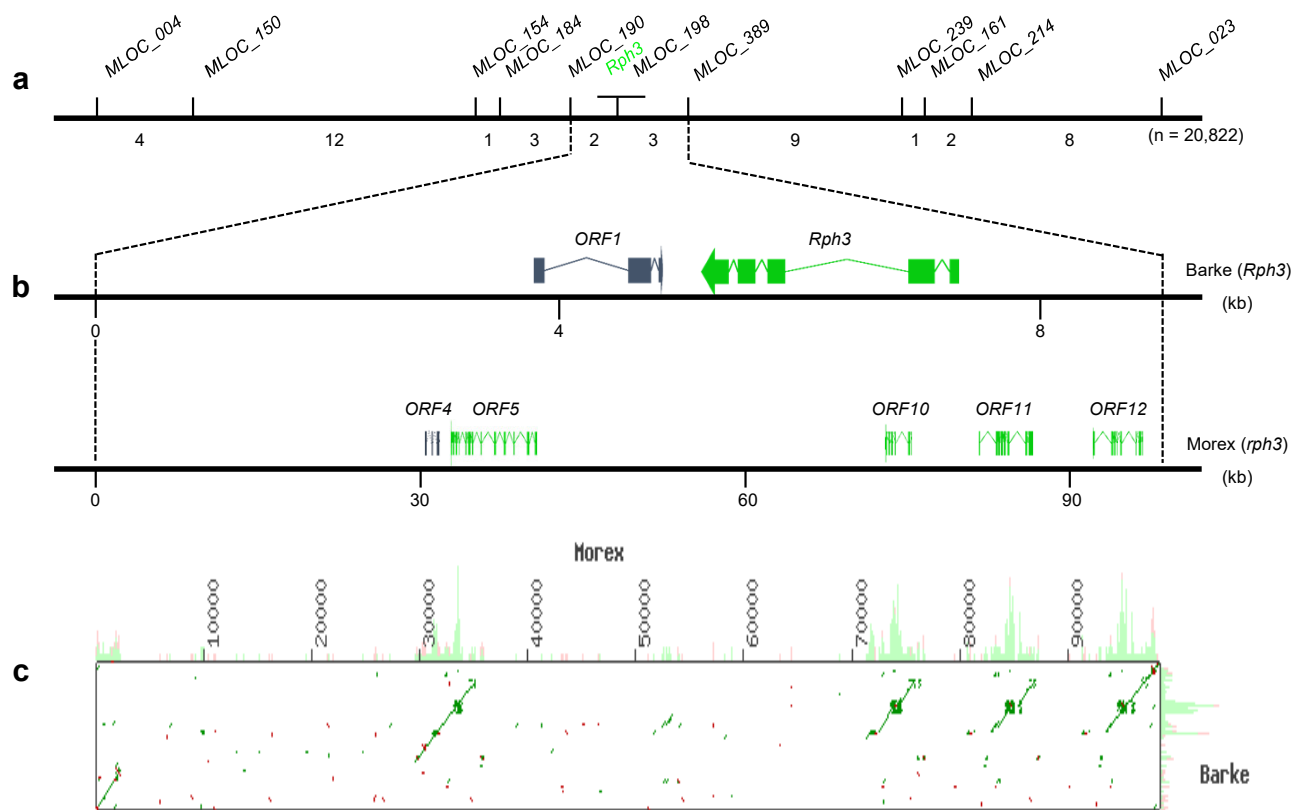

**Supplementary Figure 17.** Genomic structures of the *Rph3* locus in resistant (Barke) and susceptible (Morex) cultivars. **a** Genetic map of the *Rph3* locus. **b** Physical maps of the *Rph3* locus in cvs. Barke (*Rph3*) and Morex (*rph3*). In cv. Barke, the *Rph3* locus was located in an 8,519-bp region containing putative genes named *ORF1* (black arrow) and *Rph3* (green arrow). In cv. Morex, the same flanked interval was 98,478 bp and contained 12 putative genes named *ORF1* to *ORF12*, among which *ORF4* (black arrow) was a homolog of *ORF1* in cv. Barke and four genes *ORF5*, *ORF10*, *ORF11*, and *ORF12* (green arrows) were homologs of *Rph3*. **c** Dot plot created using the DNA sequence of the *Rph3* locus in cvs. Barke and Morex. The second half of the 8.5-kb DNA fragment in cv. Barke was repeated four times in cv. Morex, where four homologs of *Rph3* were detected.



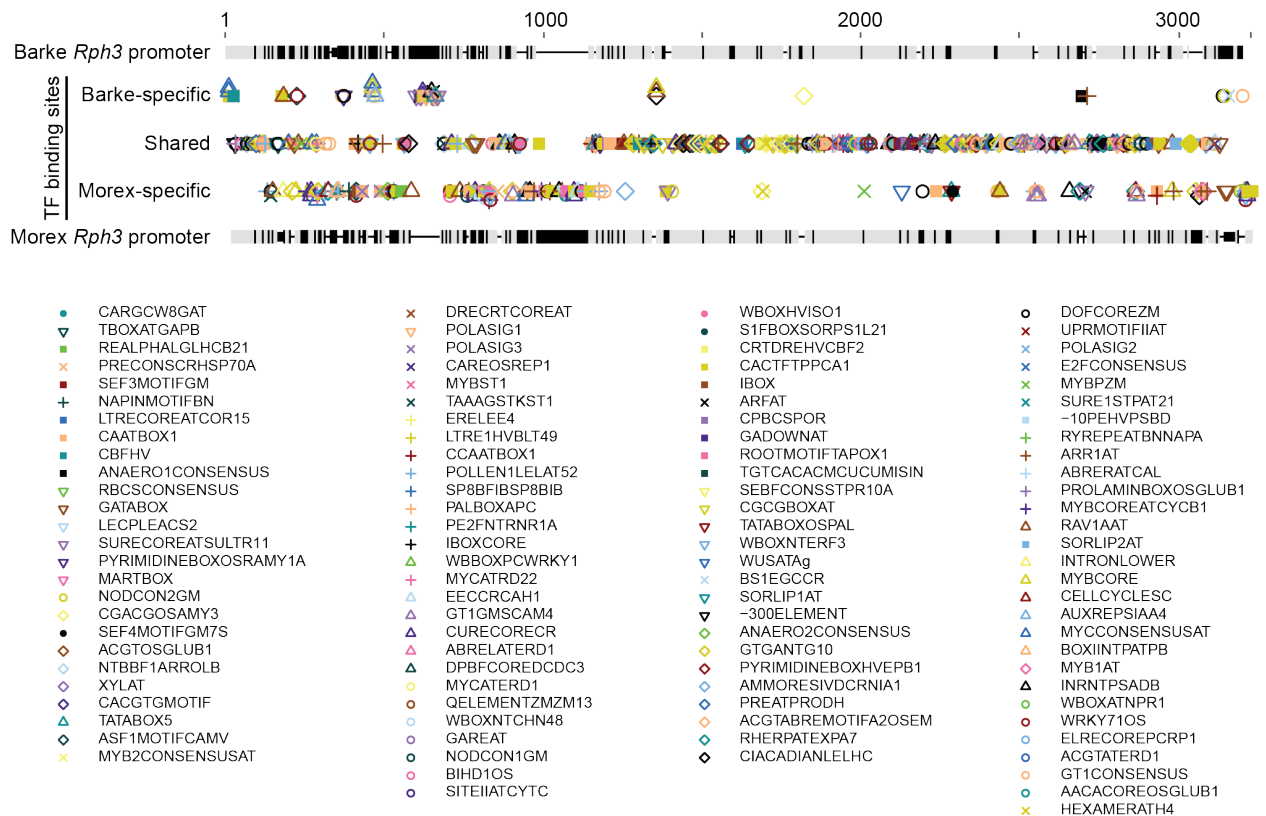

**Supplementary Figure 18.** Extensive sequence variation in the *Rph3* promoter between Barke (*Rph3*) and Morex (*rph3*) haplotypes. Pairwise alignments of *Rph3* promoters in Barke (*Rph3*) and Morex (*rph3*) were performed using Geneious alignment (gap open penalty of 12; gap extension penalty of 3). Sequence identity was 81.7% (2,598/3,179). Transcription factor binding sites from PLACE (version 30.0) were superimposed on the alignment. Shared, Barke-specific, and Morex-specific binding sites were identified within the conserved and sequence unique regions, respectively. Orientation of the promoter is 5' to 3'. The legend shows the unique color and shape coding for all transcription factor binding sites.

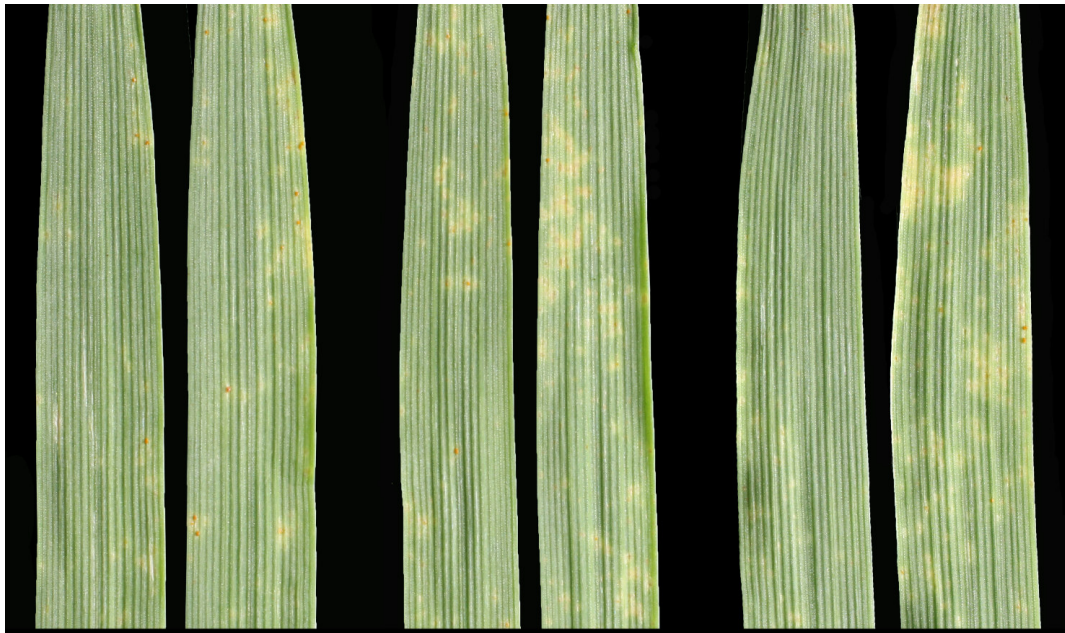

*Rph3.c*

*Rph3.aa*

*Rph3.w*

**Supplementary Figure 19.** The responses of various postulated alleles of the *Rph3* gene to the *P. hordei* pathotype 5453 P+. In all three lines, 86ZBY99 carrying *Rph3.c*, 87ZBY99 carrying *Rph3.aa*, and 88ZBY99 carrying *Rph3.w*, the infection type was similar, with tiny colonies and occasional uredinia surrounded by chlorosis. All resistant parents in mapping populations (Supplementary Table 3) carry the *Rph3.c* allele. The inoculation was performed on 15 – 20 plants of each material with similar results.

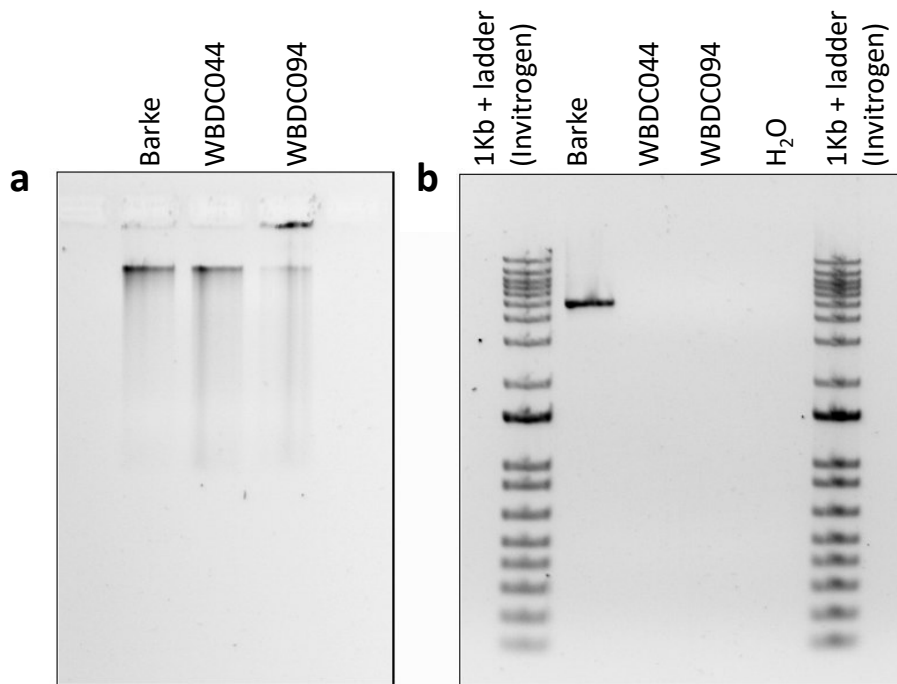

**Supplementary Figure 20.** The amplification of the *Rph3* alleles in wild barley accessions. **a** Quality of the DNA samples extracted from cv. Barke and two wild barley accessions (WBDC044 and WBDC094). **b** The amplification of the *Rph3* alleles in two wild barley accessions (WBDC044 and WBDC094) with Barke was used as positive control and water was used as no template control.

**Supplementary Table 1. The predominance of *P. hordei* pathotype virulent for the *Rph3* gene in Australia**

| <b>Year</b> | <b>Number of isolates</b> | <b>Number isolates virulent for <i>Rph3</i></b> | <b>Frequency (%) of virulence for <i>Rph3</i></b> |
|-------------|---------------------------|-------------------------------------------------|---------------------------------------------------|
| 2009        | 96                        | 6                                               | 6.30                                              |
| 2010        | 172                       | 42                                              | 24.40                                             |
| 2011        | 65                        | 3                                               | 4.60                                              |
| 2012        | 25                        | 0                                               | 0.00                                              |
| 2013        | 53                        | 20                                              | 37.70                                             |
| 2014        | 48                        | 23                                              | 47.90                                             |
| 2015        | 55                        | 31                                              | 56.40                                             |
| 2016        | 116                       | 112                                             | 96.60                                             |
| 2017        | 198                       | 160                                             | 80.80                                             |
| 2018        | 20                        | 16                                              | 80.00                                             |
| 2019        | 10                        | 9                                               | 90.00                                             |

Supplementary Table 2. Pedigrees and gene postulation of the barley materials used in the construction of genetic map, mutant population, and the complementation test

| Cultivar       | Synonym/<br>identifier | Rph3<br>Genotype | Other<br>Rph<br>genes | Pedigree                                                        | Response to <i>P. hordei</i> pathotype |                   |                   |                        |                  |                   | Used for              |
|----------------|------------------------|------------------|-----------------------|-----------------------------------------------------------------|----------------------------------------|-------------------|-------------------|------------------------|------------------|-------------------|-----------------------|
|                |                        |                  |                       |                                                                 | 200 P-<br>[=518]                       | 5453 P+<br>[=584] | 5457 P+<br>[=612] | 220 P+ Rph13<br>[=577] | 253 P-<br>[=490] | 4610 P+<br>[=507] |                       |
| Alexis         | PI 564487              | <i>Rph3</i>      | Nil                   | Breun1622/Triumph                                               | ;cn                                    | ;1+cn             | 3+                | ;12n                   | ;1n              | ;12n              | Crossing              |
| Barke          | HOR 13170              | <i>Rph3</i>      | Nil                   | Libelle/Alexis                                                  | 0;n                                    | ;1cn              | 3+                | 0;=                    | 0;n              | 0;                | Physical mapping      |
| BW746          | BW746                  | <i>Rph3</i>      | Nil                   | Bowman*11//Estate/3.2 uz als                                    | 0;n                                    | ;1-cn             | 3+                | ;c                     | ;cn              | ;c                | Crossing and mutating |
| Henley         | -                      | <i>Rph3</i>      | Nil                   | Cellar/NSL97-554                                                | ;cn                                    | ;1+cn             | 3+                | 0;                     | ;cn              | ;c                | Mutating              |
| Scarlett       | 3880-I                 | <i>Rph3</i>      | Nil                   | Amazone/Breun-2730-E//KYM                                       | ;+cn                                   | ;1cn              | 3+                | 0;=                    | ;n               | 0;                | Crossing              |
| Volla          | PI 321852              | <i>Rph3</i>      | Nil                   | Breuns Wisa/Heines Haisa 1                                      | 0;                                     | ;1cn              | 33+               | 0;=n                   | ;n               | 0;-               | Crossing              |
| Bowman         | PI483237               | <i>rph3</i>      | Nil                   | ND2685/ND1156//Hector                                           | 33+                                    | 3+                | 3+                | 3+                     | 3+               | 3+                | Crossing              |
| Flagship       | WI3408                 | <i>rph3</i>      | Nil                   | Chieftan/Barque//Manley/VB9104                                  | 3+                                     | 33+c              | 3+                | 3+                     | 3+               | 3+                | Crossing              |
| Golden Promise | Line 759/4             | <i>rph3</i>      | Nil                   | gamma-ray induced semi-dwarf mutant of the cultivar 'Maythorpe' | 33+                                    | 3+                | 3+                | 33+                    | 3+               | 33+               | Gene transforming     |
| Gus            | PI 494521              | <i>rph3</i>      | Nil                   | Selection from Composite Cross XXXII-76                         | 3+                                     | 3+                | 3+                | 3+                     | 3+               | 3+                | Crossing              |
| Sloop          | WI2875-22              | <i>rph3</i>      | <i>Rph19</i>          | RL1577/84/Schooner                                              | 1+2+c                                  | 3+                | 3+                | 3+                     | ;1n              | 3+                | Crossing              |
| Tallon         | PI 573731              | <i>rph3</i>      | <i>Rph12</i>          | Triumph/Grimmett                                                | ;1=n                                   | 3+                | 3+                | ;+n                    | ;1+n             | 3+                | Crossing              |

**Supplementary Table 3. The mapping populations used for high-resolution mapping of the *Rph3* locus**

| <b>Female (allele)</b>            | <b>Male (allele)</b>              | <b>Generation</b> | <b>No. plants</b> | <b>No. gametes</b> | <b>No. recombinant plants<sup>b</sup></b> |
|-----------------------------------|-----------------------------------|-------------------|-------------------|--------------------|-------------------------------------------|
| Tallon ( <i>rph3</i> )            | Scarlett ( <i>Rph3</i> )          | F2                | 4,100             | 8,200              | 22                                        |
| Sloop ( <i>rph3</i> )             | Alexis ( <i>Rph3</i> )            | F2                | 4,553             | 9,106              | 15                                        |
| Volla ( <i>Rph3</i> )             | Gus ( <i>rph3</i> )               | F2                | 466               | 932                | 5                                         |
| Volla ( <i>Rph3</i> )             | Flagship ( <i>rph3</i> )          | F2                | 645               | 1,290              | 1                                         |
| Bowman ( <i>rph3</i> )            | BW746( <i>Rph3</i> ) <sup>a</sup> | F2                | 553               | 1,106              | 2                                         |
| BW746( <i>Rph3</i> ) <sup>a</sup> | Gus ( <i>rph3</i> )               | F2                | 94                | 188                | 0                                         |
| <b>Total</b>                      |                                   |                   | <b>10,411</b>     | <b>20,822</b>      | <b>45</b>                                 |

<sup>a</sup> The near-isogenic line of the cultivar Bowman carrying the *Rph3*.c allele from the landrace Estate

<sup>b</sup> The recombinations were between markers MLOC\_004 and MLOC\_023

**Supplementary Table 4. Description of EMS induced mutants in the *Rph3* locus**

| Mutant line | Origin             | Mutant position | Nucleotide change | Amino acid change | Site of mutation (Exon/Intron number) | Infection type <sup>c</sup> | Fertility status  | Observation on development                        |
|-------------|--------------------|-----------------|-------------------|-------------------|---------------------------------------|-----------------------------|-------------------|---------------------------------------------------|
| M167        | BW746 <sup>a</sup> | 1907            | C > T             | Leu93Phe          | Exon 2                                | 33-                         | Partially fertile | Well developed, healthy seeds                     |
| M181        | BW746 <sup>a</sup> | 3057            | C > T             | Pro126Leu         | Exon 3                                | 2+                          | Partially fertile | Well developed, healthy seeds                     |
| M466        | BW746 <sup>a</sup> | 1593            | G > A             | frameshift mutant | Intron 1                              | 3+                          | Partially fertile | Very stunted, abortive seeds                      |
| M198        | Henley             | 1844            | G > T             | Glu > Stop codon  | Exon 2                                | 33+                         | Partially fertile | Well developed, healthy seeds                     |
| M177        | BW746 <sup>a</sup> | None            | None              | None              | Ni <sup>b</sup>                       | 22+c                        | Partially fertile | well developed, pale green leaves, abortive seeds |
| M188        | BW746 <sup>a</sup> | None            | None              | None              | Ni <sup>b</sup>                       | 22+c                        | Partially fertile | Well developed, healthy seeds                     |

<sup>a</sup> The near-isogenic line of the cultivar Bowman carrying the *Rph3.c* allele from the landrace Estate

<sup>b</sup> No Information

<sup>c</sup> Inoculated with *P. hordei* pathotype 5453P+. The scoring is “0”-“4” known as infection types (IT), conveying variation from complete immunity (0) to a fully susceptible response (4). The letters c and n are included to indicate greater than normal chlorosis or necrosis, respectively. The symbols – is added to indicate infection types that is lower than normal, and + to indicate infection types higher than normal.

Supplementary Table 5. Barley induced mutants selected for *Rph3* using forward genetics

| Parent 1 <sup>a</sup> | Parent 2 <sup>a</sup> | Type of cross | Response to pathotype 5453P+ <sup>c</sup> |          |      | Allelic status |
|-----------------------|-----------------------|---------------|-------------------------------------------|----------|------|----------------|
|                       |                       |               | Parent 1                                  | Parent 2 | F1   |                |
| M167                  | M181                  | (I) x (I)     | 33-                                       | 2+       | 22+c | Allelic        |
| M167                  | M188                  | (I) x (II)    | 33-                                       | 22+c     | ;1+c | Not allelic    |
| M177                  | M188                  | (II) x (II)   | 22+c                                      | 22+c     | ;1+c | Not allelic    |
| BW746 <sup>b</sup>    |                       |               | ;1-cn                                     |          |      |                |
| Bowman                |                       |               | 3+                                        |          |      |                |

<sup>a</sup> All the parents used for crossing were derived from BW746

<sup>b</sup> The near-isogenic line of the cultivar Bowman carrying the *Rph3*.c allele from the landrace Estate

<sup>c</sup> The scoring is “0”-“4” known as infection types (IT), conveying variation from complete immunity (0) to a fully susceptible response (4). The letters c and n are included to indicate greater than normal chlorosis or necrosis, respectively. The symbols – is added to indicate infection types that is lower than normal, and + to indicate infection types higher than normal.

Group (I) consists of known mutants and group (II) consists of altered phenotype mutants without changes in the *Rph3* sequence



**Supplementary Table 6. Progeny test of *Rph3* transgenic plants in barley**

| <b>Accessions</b> | <b>No. of seedlings</b> | <b>Phenotype (resistance : susceptible)</b> | <b>Genotype of MLOC_400 (<i>Rph3</i> : <i>rph3</i>)</b> | <b>inconsistency</b> |
|-------------------|-------------------------|---------------------------------------------|---------------------------------------------------------|----------------------|
| Estate            | 12                      | 12 : 0                                      | 12 : 0                                                  | 0/12                 |
| BW746             | 12                      | 12 : 0                                      | 12 : 0                                                  | 0/12                 |
| Bowman            | 10                      | 0 : 10                                      | 0 : 10                                                  | 0/10                 |
| Golden Promise    | 10                      | 0 : 10                                      | 0 : 10                                                  | 0/10                 |
| BG_925_E02        | 10                      | 7 : 3                                       | 7 : 3                                                   | 0/10                 |
| BG_925_E04        | 11                      | 0 : 11                                      | 4 : 7                                                   | 4/11                 |
| BG_925_E06        | 9                       | 6 : 3                                       | 6 : 3                                                   | 0/9                  |
| BG_925_E08        | 12                      | 12 : 0                                      | 12 : 0                                                  | 0/12                 |
| BG_925_E10        | 12                      | 9 : 3                                       | 9 : 3                                                   | 0/12                 |
| BG_925_E12        | 11                      | 0 : 11                                      | 0 : 11                                                  | 0/11                 |
| BG_925_E13        | 10                      | 1 : 9                                       | 1 : 9                                                   | 0/10                 |
| BG_925_E15        | 12                      | 10 : 2                                      | 12 : 0                                                  | 2/12                 |
| BG_925_E17        | 12                      | 0 : 12                                      | 0 : 12                                                  | 0/12                 |
| BG_925_E18        | 10                      | 8 : 2                                       | 8 : 2                                                   | 0/10                 |
| BG_925_E19        | 12                      | 11 : 1                                      | 11 : 1                                                  | 0/12                 |
| BG_925_E20        | 12                      | 0 : 12                                      | 0 : 12                                                  | 0/12                 |
| BG_925_E21        | 13                      | 11 : 2                                      | 11 : 2                                                  | 0/13                 |
| BG_925_E22        | 10                      | 3 : 7                                       | 3 : 7                                                   | 0/10                 |
| BG_925_E23        | 12                      | 9 : 3                                       | 9 : 3                                                   | 0/12                 |
| BG_925_E24        | 11                      | 11 : 0                                      | 11 : 0                                                  | 0/11                 |
| BG_925_E25        | 12                      | 5 : 7                                       | 5 : 7                                                   | 0/12                 |
| BG_925_E26        | 11                      | 5 : 6                                       | 5 : 6                                                   | 0/11                 |
| BG_925_E27        | 10                      | 1 : 9                                       | 1 : 9                                                   | 0/10                 |
| BG_925_E28        | 9                       | 7 : 2                                       | 7 : 2                                                   | 0/9                  |

**Supplementary Table 7. The sequences similar to the RPH3 protein identified by the Hidden Markov Model HHpred**

| Hit    | Probability | E-value  | P-value | Score <sup>(1)</sup> | SS <sup>(2)</sup> | Aligned Cols <sup>(3)</sup> | Query HMM | Template HMM | Organism                               |
|--------|-------------|----------|---------|----------------------|-------------------|-----------------------------|-----------|--------------|----------------------------------------|
| 7B2L_B | 54.8        | 22       | 0.00036 | 30.6                 | 3.6               | 48                          | 143-194   | 63-110       | -291 <i>Saccharomyces cerevisiae</i>   |
| 5O07_A | 45.9        | 2.10E+02 | 0.0034  | 23.8                 | 7.8               | 67                          | 143-235   | 61-127       | -257 <i>Chaetomium thermophilum</i>    |
| 6YXH_A | 36.2        | 3.50E+02 | 0.0057  | 23.5                 | 14.3              | 178                         | 58-239    | 127-341      | -350 <i>Homo sapiens</i>               |
| 5L26_C | 33.7        | 5.60E+02 | 0.0092  | 25.1                 | 14.2              | 132                         | 69-242    | 3-143        | -431 <i>Neisseria wadsworthii</i>      |
| 6V7U_A | 32.5        | 2.60E+02 | 0.0043  | 22.4                 | 6.1               | 48                          | 170-240   | 6-53         | -69 <i>Pseudomonas virus</i>           |
| 1TZV_A | 30.5        | 2.00E+02 | 0.0032  | 21.6                 | 5.0               | 68                          | 167-236   | 44-114       | -142 <i>Thermotoga maritima</i>        |
| 4R3Q_B | 30.4        | 1.70E+02 | 0.0027  | 23.9                 | 4.8               | 40                          | 195-240   | 24-66        | -88 <i>Mus musculus</i>                |
| 6FBX_A | 27.7        | 3.50E+02 | 0.0057  | 20.9                 | 9.9               | 86                          | 151-236   | 20-125       | -152 <i>Danio rerio</i>                |
| 6VN7_R | 27.2        | 6.50E+02 | 0.011   | 23.8                 | 13.9              | 134                         | 73-224    | 132-269      | -582 <i>Homo sapiens</i>               |
| 6YS8_C | 26.9        | 3.90E+02 | 0.0064  | 24.2                 | 7.0               | 71                          | 67-137    | 2-73         | -215 <i>Flavobacterium johnsoniae</i>  |
| 2VPZ_G | 26.6        | 5.30E+02 | 0.0085  | 22.5                 | 8.8               | 85                          | 61-152    | 73-164       | -253 <i>Thermus thermophilus</i>       |
| 7JRG_O | 23.0        | 7.90E+02 | 0.013   | 23.3                 | 13.3              | 121                         | 9-148     | 39-159       | -393 <i>Vigna radiata var. radiata</i> |
| 6S7T_C | 20.1        | 4.70E+02 | 0.0076  | 19.6                 | 5.6               | 45                          | 76-120    | 24-73        | -79 <i>Homo sapiens</i>                |
| 5A1S_D | 20.1        | 7.10E+02 | 0.011   | 23.5                 | 7.5               | 112                         | 33-146    | 8-127        | -448 <i>Salmonella enterica</i>        |

<sup>(1)</sup> Raw score

<sup>(2)</sup> Secondary structure score

<sup>(3)</sup> Length of the aligned region

**Supplementary Table 8. GBS markers landing on the *Rph3* gene was used for detecting the gene in the worldwide barley collection**

| <b>Marker name</b> | <b>Sequence</b>                                                                                             |
|--------------------|-------------------------------------------------------------------------------------------------------------|
| gRph3_I1E2         | GAAATGGATGCAGGAGCTTTCGTCGTCGGCAGTATGACCATGAACACCATCGTGAACCTGGCCGTTCTCCTGCTCTGCATCCAACAGACGTAAGATAAAGAAATGTT |
| gRph3_E2I2         | CGCGGGCGAACTGTTTCTTCGTAATTTTCAGTCGCTCGAGCTTCAAATCTCGTGTCTACGACAGGCGGTGCTGCTCTCCGTTGTGTGCTCCCACCGCTAACGACAC  |

**Supplementary Table 9. Virulence profile of *P. hordei* and *P. triticina* pathotypes used in this study**

| <b>Pathotype</b>        | <b>Species</b>            | <b>Culture number</b> | <b>Year of collection</b> | <b>Place of collection</b>   | <b>Virulent</b>                                  |
|-------------------------|---------------------------|-----------------------|---------------------------|------------------------------|--------------------------------------------------|
| 200 P-                  | <i>Puccinia hordei</i>    | 518                   | not known                 | Queensland, Australia        | <i>Rph8</i>                                      |
| 5453 P+                 | <i>Puccinia hordei</i>    | 584                   | 2004                      | Western Australia, Australia | <i>Rph1-2, Rph4, Rph6, Rph9-10, Rph12, Rph19</i> |
| 5457 P+                 | <i>Puccinia hordei</i>    | 612                   | 2009                      | Queensland, Australia        | <i>Rph1-4, Rph6, Rph9-10, Rph12, Rph19</i>       |
| 5656 P+                 | <i>Puccinia hordei</i>    | 623                   | 2012                      | Victoria, Australia          | <i>Rph1-4, Rph6, Rph8-10, Rph12, Rph19</i>       |
| 26-0                    | <i>Puccinia triticina</i> | 111                   | 1974                      | New South Wales, Australia   | <i>None</i>                                      |
| 104-1,2,3,(6),(7),11,13 | <i>Puccinia triticina</i> | 547                   | 2000                      | South Australia, Australia   | <i>None</i>                                      |

**Supplementary Table 10. Primers used for the expression analysis**

| <b>Marker name</b> | <b>Target gene</b>                           | <b>Forward primer</b>  | <b>Reverse primer</b> | <b>Annealing temperature</b> | <b>Extension time (sec)</b> | <b>Product size (bp)</b> |
|--------------------|----------------------------------------------|------------------------|-----------------------|------------------------------|-----------------------------|--------------------------|
| Rph3_qPCR7         | <i>Rph3</i>                                  | CGTCGGCAGTATGACCATGA   | GCGCCGAATACATGAACGTC  | 60                           | 20                          | 83                       |
| ORF1_qPCR1         | <i>ORF1</i> in Barke                         | TGCCAGGAACAACACACAGT   | GGCTCGTTCCTTCCTTCT    | 60                           | 20                          | 113                      |
| rph3_qPCR5         | <i>ORF5, ORF10, ORF11 and ORF12</i> in Morex | AGGATCACTCCTGGCACACT   | TTTTGATTGCCTCCATCCTC  | 60                           | 20                          | 112                      |
| ADPRF              | ADP-Ribosylation Factor                      | CCCTGTGGAGGCACTACTTTCA | TCACGCAGCTCATCCTCATTC | 60                           | 20                          | 127                      |
